# Selective Breeding Alters Murine Resistance to Nitrous Oxide Without Alteration in Synaptic Membrane Lipid Composition

Donald D. Koblin, Ph.D.,\* David E. Dong, A.B.,† Joan E. Deady, M.S.,† Edmond I. Eger, II, M.D.‡

A normal population of mice was separated into two groups with reproducibly high ( $>1.63$  atm) or reproducibly low ( $<1.29$  atm) nitrous oxide requirements. Males ( $n = 4$ ) and females ( $n = 5$ ) with the reproducibly high anesthetic requirements were mated, as were males ( $n = 4$ ) and females ( $n = 3$ ) with the reproducibly low anesthetic requirements. The first-generation offspring from parents with the high anesthetic requirements had a higher nitrous oxide  $ED_{50}$  (concentration of nitrous oxide required to abolish the righting reflex in half of the animals) than did offspring from parents with the low anesthetic requirements. Mice with the lowest and the highest anesthetic requirements in the first generation were bred to give the second generation. By repeating this process of breeding, nitrous oxide  $ED_{50}$  testing, and selection of mice with the highest and lowest anesthetic requirements through five generations, the authors were able to breed two groups of mice separated by approximately 0.5 atm in nitrous oxide requirements. This alteration in anesthetic requirement could not be explained by an altered synaptic membrane lipid composition, since no significant difference in synaptic membrane phospholipid, fatty acid, or cholesterol compositions could be detected in the two groups of mice with high and low anesthetic requirements. (Key words: Anesthetics, gases: nitrous oxide. Brain: lipids, synapses. Genetic factors. Potency:  $ED_{50}$ ; righting reflex. Theories of anesthesia: lipid solubility.)

ANESTHETIC REQUIREMENTS vary slightly among animals of a given species. However, the variability for a given animal is less than the variability of the population from which that animal was drawn.<sup>1</sup> The reproducible nature of the anesthetic requirement for a single animal suggests that the different values among animals do not simply represent day-by-day variation of a homogeneous population. This implies a distribution of anesthetic requirements that may allow a normal population to be divided into resistant and vulnerable members. The present report documents this thesis for nitrous oxide requirements in mice. In addition, we show that these differences in anesthetic requirements may be transferred to the offspring.

Because of the near-perfect correlation between lipid solubility and anesthetic potency,<sup>2,3</sup> and because of the ability of general anesthetics to perturb the

physical state of phospholipid model membranes,<sup>4-8</sup> we postulated that mice resistant to and susceptible to nitrous oxide anesthesia might differ in their neuronal membrane lipid compositions. We therefore examined the synaptic membrane fatty acid, phospholipid, and cholesterol compositions in the mice with high versus low anesthetic requirements.

## Methods and Materials

All mice employed in these experiments were fed Purina® laboratory chow and water *ad libitum*, and were maintained on a 12 hr:12 hr light:dark cycle.

The righting reflex was examined in 500 male and 100 female stock CD-1 mice (Charles River), weighing 25 to 30 g, at  $N_2O$  partial pressures of 1.29, 1.46, and 1.63 atm. Eight unrestrained mice were placed in individual wire mesh cages that could be rotated at 4 rpm in a 20-liter hyperbaric chamber.<sup>9</sup> Chamber temperature was adjusted with circulating water heat exchangers to maintain rectal temperatures of two additional restrained mice between 36.5 and 38.0 C. Circulation of chamber gases through a soda lime container removed carbon dioxide. The hyperbaric chamber was flushed with 100 per cent oxygen for 10 min before 1.29 atm  $N_2O$  was added. After a 30-min equilibrium, animals rolling over twice during five complete turns of the rotator failed the test and were considered anesthetized. Two further additions of  $N_2O$  were made in increments of 0.17 atm, and animals were re-examined at each dose, following a 15-min equilibration, for their ability to right themselves.

Mice that failed the righting reflex test at 1.29 atm or more were placed into a LO group. Those that passed this test at 1.63 atm or below were placed in a HI group. Each LO and HI animal was then re-tested three or four more times at weekly intervals. Only mice that consistently failed the righting reflex test at 1.29 atm  $N_2O$  were kept in the LO group, and only mice that consistently passed the righting reflex test at 1.63 atm  $N_2O$  were kept in the HI group. We obtained four males and three females in the LO group and four males and five females in the HI group.

LO male mice were mated with LO female mice, and HI males with HI females. The  $N_2O$   $ED_{50}$  (the partial pressure of  $N_2O$  required to abolish the right-

\* Assistant Research Chemist.

† Staff Research Associate.

‡ Professor of Anesthesiology.

Received from the Department of Anesthesia, University of California, San Francisco, California 94143. Accepted for publication November 27, 1979. Supported by USPHS Research Grant 5P01-GM-15571.

Address reprint requests to Dr. Koblin.

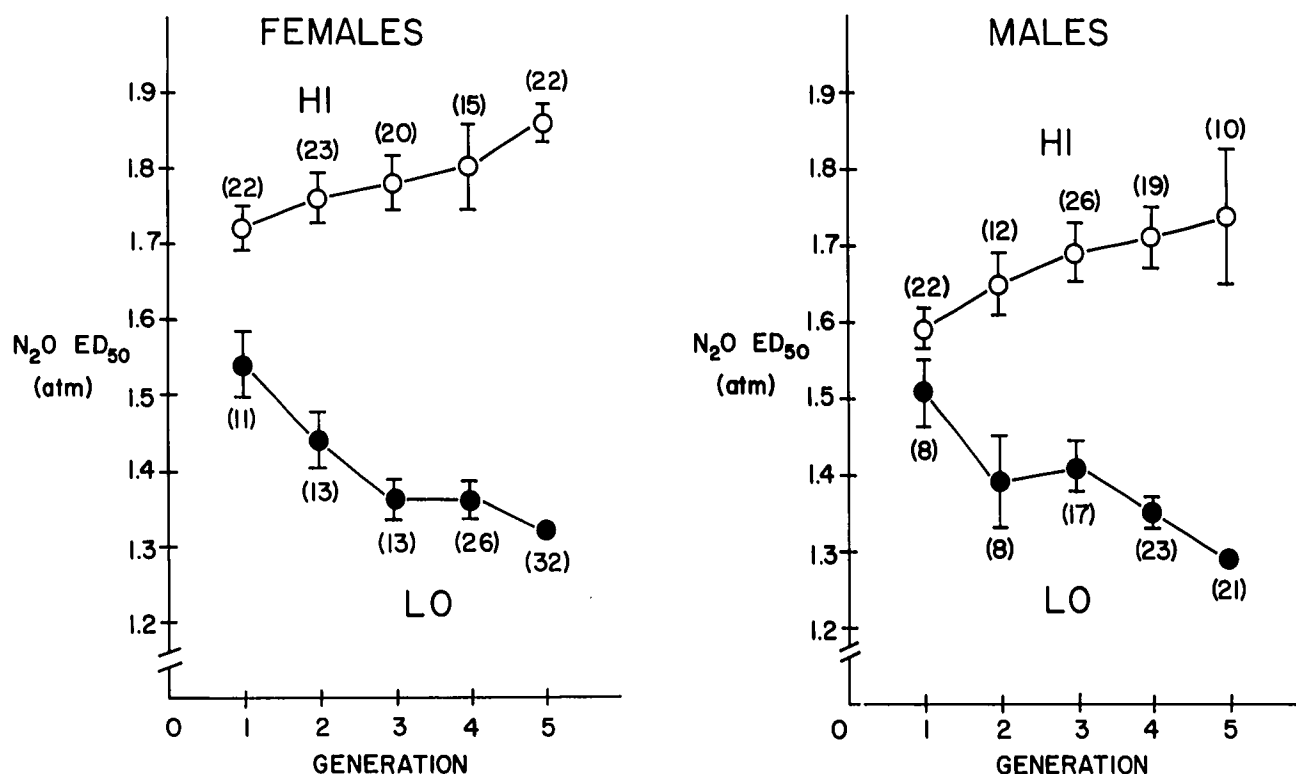

FIG. 1. Nitrous oxide ED<sub>50</sub> values  $\pm$  SE in the offspring of mice that were selectively bred for their resistance to (HI group) and susceptibility to (LO group) nitrous oxide anesthesia. Number in parentheses indicates the number of mice tested for the individual ED<sub>50</sub> value. The differences in nitrous oxide requirements for the first-generation HI and LO females were statistically significant ( $P < 0.001$ ).

ing reflex in half the animals) was determined under controlled-temperature conditions in the offspring of these mice (first generation). Mice were placed in the hyperbaric chamber, the chamber was flushed with O<sub>2</sub> for 10 min, and 1.22 atm N<sub>2</sub>O was added. Following a 30-min equilibration, animals were examined for their ability to pass the righting reflex test. Nitrous oxide was added or removed in 0.11-atm steps, and the mice were retested after a 15-min equilibration. Oxygen always remained above 0.6 atm during testing. Concentrations of N<sub>2</sub>O were determined by gas chromatography. Anesthetic requirement was calculated for each individual by averaging the nitrous oxide partial pressures (concentration times chamber pressure) that just permitted and prevented the animal from righting itself. The ED<sub>50</sub> and standard error values for a group of mice were calculated from these individual crossover values. If an animal died during the study, its responses were not included in the ED<sub>50</sub> calculations. Significance was calculated by use of a *t* test for unpaired data. All ED<sub>50</sub> measurements were performed with the observer unaware of the identity of the animals.

The males and females with the lowest and the high-

est anesthetic requirements in the first generation were bred to give the second generation. This process of breeding, N<sub>2</sub>O ED<sub>50</sub> testing, and selection of mice with the lowest and highest anesthetic requirements was repeated through five generations. For breeding, one male was mated with one to three females. We avoided brother-sister matings. Mice were weaned at three weeks of age, and N<sub>2</sub>O ED<sub>50</sub> measurements were performed at two to four months of age.

Synaptic plasma membranes were prepared from whole brains of the HI and LO mice after the procedure of Jones and Matus.<sup>10</sup> Brains were homogenized in 10 per cent (w/w) sucrose and the homogenate centrifuged at 800 *g* for 20 min to remove the nuclear pellet. The supernatant was centrifuged at 9,000 *g* for 20 min to obtain the crude mitochondrial pellet, which was washed once in 10 per cent (w/w) sucrose. The crude mitochondrial pellet was lysed in 5 mM tris (pH 8.1 at 4°C), and the suspension was mixed with a 48 per cent (w/w) sucrose solution to give a final concentration of 34 per cent (w/w) sucrose. The sample suspension was overlaid with a 28.5 per cent (w/w) and a 10 per cent (w/w) sucrose solution, and was centrifuged for 110 min at 21,500 rpm on

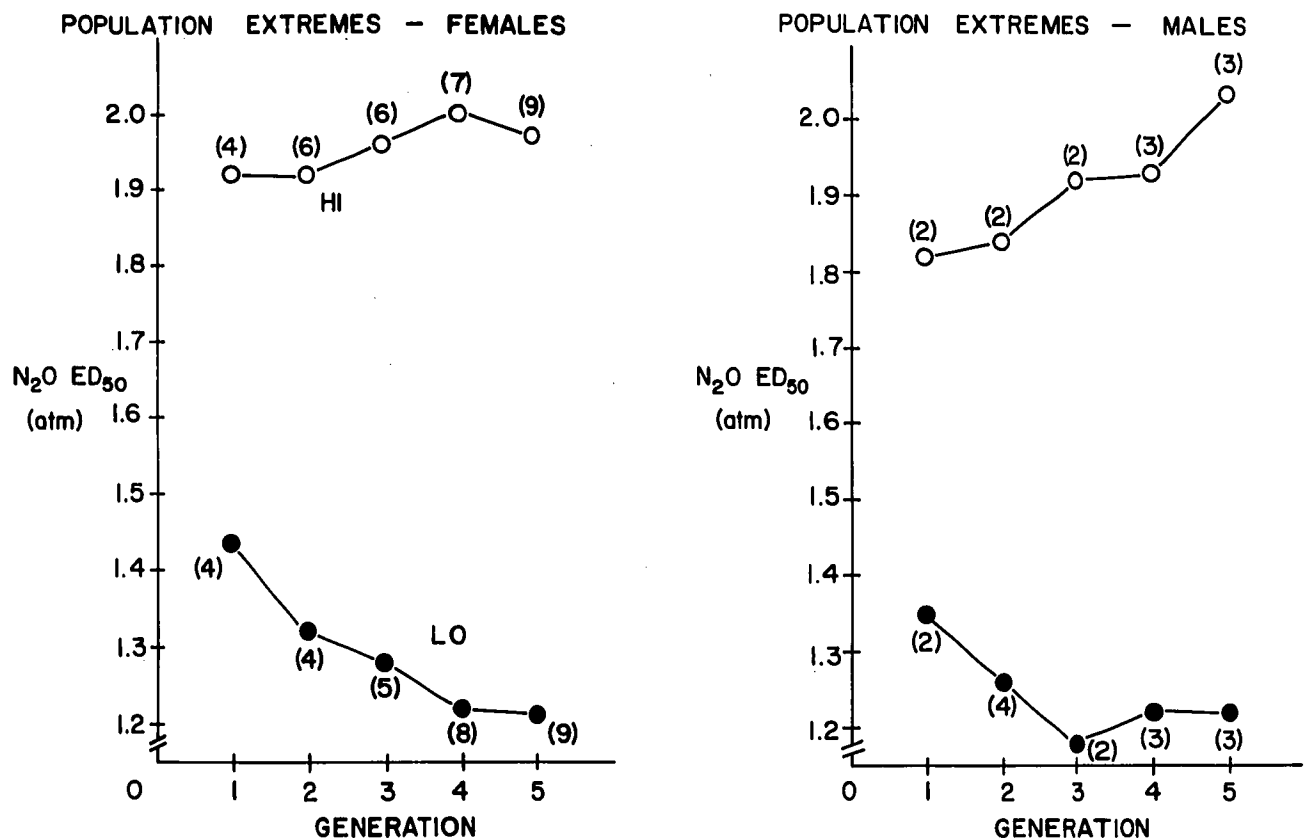

Fig. 2. Selection for breeding of mice with the lowest nitrous oxide requirements in the LO group and the highest nitrous oxide requirements in the HI group, to give the following generation of HI and LO animals. Number in parentheses represents the number of animals selected for mating. Each point represents the average nitrous oxide requirement for the number of animals selected.

a Beckman SW27 rotor. An enriched fraction of synaptic membranes separated at the 28.5–34 per cent sucrose interface, myelin at the 10–28.5 per cent sucrose interface, and mitochondria sedimented to the bottom. Sucrose solutions were buffered with 5 mM HEPES, pH 7.4. Procedures were carried out at 0–4 C and all solutions were saturated with argon to minimize lipid oxidation.

We tested for separation of cellular components by various enzymatic assays. Na<sup>+</sup> + K<sup>+</sup> ATPase, acetylcholinesterase, lactate dehydrogenase, and succinate dehydrogenase activities were measured in the homogenate, myelin, synaptic plasma membrane, and mitochondrial fractions for each preparation. Synaptic plasma membranes showed a two- to threefold enrichment in Na<sup>+</sup> + K<sup>+</sup> ATPase and acetylcholinesterase activities and low levels of lactate dehydrogenase and succinate dehydrogenase activities compared with the homogenate.

Synaptic membrane lipid analyses were performed on selected mice from the fourth and fifth generations that had individual anesthetic requirements lower

than that of the LO group average or higher than that of the HI group average. Mice selected from the LO group had an average nitrous oxide requirement of  $1.27 \pm 0.01$  atm ( $\pm$ SE;  $n = 24$ , 12 males and 12 females). Mice selected from the HI group had an average nitrous oxide requirement of  $1.88 \pm 0.03$  atm ( $\pm$ SE;  $n = 21$ , 7 males and 14 females). Brains from two or three mice of the same sex were pooled for each synaptic membrane preparation. Since no significant effect due to sex was seen in the fatty acid, phospholipid, or cholesterol compositions, the results for the two sexes were combined.

Lipids were extracted from synaptic membranes by sonication with methanol once and with a 1:1 chloroform:methanol solution twice. Synaptic membrane phospholipids and cholesterol were separated by one-dimensional thin-layer chromatography (TLC) with a solvent system consisting of chloroform:methanol:acetic acid:water in the ratios of 65:50:5:3. Phospholipid fatty acids were transesterified to their methyl esters after a modification of the Morrison and Smith<sup>11</sup> procedure, and analyzed on a SP-2330 cyanosilicone

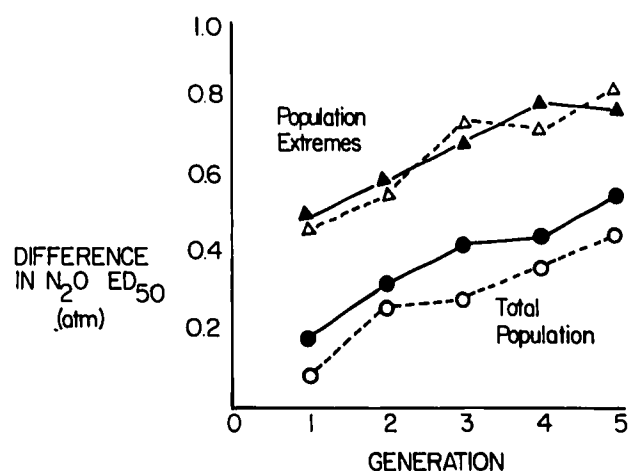

FIG. 3. Separations of HI and LO nitrous oxide  $ED_{50}$  values in five successive generations. Circles represent the differences between nitrous oxide  $ED_{50}$  values for the total populations of HI and LO animals:  $\circ$ , males;  $\bullet$ , females. Triangles represent the differences in nitrous oxide  $ED_{50}$  values for the population extremes of HI and LO animals selected for breeding:  $\Delta$ , males;  $\blacktriangle$ , females. The HI and LO population extremes selected from the original stock CD-1 mice (generation zero) were separated by at least 0.34 atm in anesthetic requirements.

column in a Hewlett Packard 5830A gas chromatograph with digital integrator. Fatty acid methyl esters were analyzed over a 180–230 C temperature range, programmed to increase at 2 degrees C/min. Phospholipids were quantitated by measuring inorganic phosphate released following perchloric acid digestion.<sup>12</sup> Cholesterol was determined by gas chromatography after reaction with trimethylsilylimidazole. Further details on the lipid analysis procedures are presented elsewhere.<sup>13</sup>

### Results

The first-generation offspring of LO-group parents had a lower  $N_2O$   $ED_{50}$  than did the first-generation offspring of HI-group parents (fig. 1). First-generation females in the HI and LO groups were separated by 0.18 atm  $N_2O$  in anesthetic requirements (fig. 1, *left*) and males by 0.08 atm (fig. 1, *right*). The differences in nitrous oxide requirements for the first-generation HI and LO females were statistically significant. Progressively greater  $ED_{50}$  separations were obtained for each generation, for both females (fig. 1, *left*) and males (fig. 1, *right*). Fifth-generation females were separated by 0.54 atm and fifth generation males by 0.45 atm in nitrous oxide requirements.

The average nitrous oxide requirements in the first-generation LO and HI population extremes of mice taken for breeding were separated by approximately 0.5 atm (fig. 2). By the fifth generation, the LO and HI population extremes were separated by about 0.8

atm (fig. 2). The lowest of the LO mice had a crossover value of 1.19 atm  $N_2O$  and the highest of the HI mice had a crossover value of 2.07 atm  $N_2O$ . The separations of HI–LO nitrous oxide  $ED_{50}$  values for the total population and for the population extremes in five successive generations are summarized in figure 3.

We analyzed the fatty-acid compositions of the five major synaptic membrane phospholipid components: sphingomyelin, phosphatidylcholine, phosphatidylserine, phosphatidylinositol, and phosphatidylethanolamine (table 1). The fatty-acid compositions of synaptic membrane phospholipids isolated from the HI mice did not differ significantly from those isolated from the LO mice (table 1). In addition, the phospholipid compositions and the cholesterol/phospholipid molar ratios of synaptic membranes isolated from the HI and LO mice were not significantly different (table 2). Whole-brain homogenate and synaptic membrane acetylcholinesterase and  $Na^+ + K^+$  ATPase activities were the same in the HI and LO animals (data not presented).

### Discussion

These studies demonstrate that a population of mice can be separated into two groups with reproducibly high or low nitrous oxide requirements, and that these differences can be transferred to the offspring. Previous studies have shown selection for phenotypes that are directly related to responses to other drugs.<sup>14</sup> Rats have been selected for high and low alcohol preferences.<sup>15</sup> Mice can be bred to differ in their sensitivities to the hypnotic effect of ethanol.<sup>16</sup> The genetic control of levorphanol-induced locomotor activity has been demonstrated in mice.<sup>17</sup> In addition, recombinant inbred mouse strains, their reciprocal F1 hybrids, and their progenitor strains show strain differences in times to induce and recover from halothane anesthesia.<sup>18</sup>

In our experiments, nitrous oxide has an advantage over most other agents as a genetic selection agent since it is essentially unmetabolized, and equilibration of inspired and brain nitrous oxide partial pressures occurs quickly.<sup>19</sup> This means that the above-described separation of nitrous oxide requirements results from an alteration in the sensitivity of the central nervous system to nitrous oxide rather than from an alteration in metabolism, absorption, distribution, or secretion. However, it remains to be seen whether these HI and LO mice are also resistant and susceptible to other general anesthetics. Furthermore, anesthetic potencies in the HI and LO mice will eventually have to be measured employing an endpoint for anesthesia other than the righting reflex (*e.g.*, response to a painful stimulus), to insure that the separations in anesthetic requirements indicate a general resistance or

TABLE 1. Fatty-acid Compositions of Synaptic Membrane Phospholipids Isolated from Mice Bred for Their Resistance or Susceptibility to Nitrous Oxide Anesthesia\*

| Fatty Acid†                       | Sphingomyelin |            | Phosphatidylcholine |            | Phosphatidylserine |            | Phosphatidylinositol |            | Phosphatidylethanolamine |            |
|-----------------------------------|---------------|------------|---------------------|------------|--------------------|------------|----------------------|------------|--------------------------|------------|
|                                   | HI‡           | LO§        | HI                  | LO         | HI                 | LO         | HI                   | LO         | HI                       | LO         |
| Palmitate<br>16:0                 | 7.4 ± 0.9¶    | 9.4 ± 1.1  | 53.5 ± 0.5          | 53.7 ± 0.4 | 1.5 ± 0.1          | 1.4 ± 0.1  | 9.3 ± 0.4            | 10.7 ± 0.7 | 8.7 ± 0.2                | 8.5 ± 0.2  |
| Palmitoleate<br>16:1 (n - 9)      | 0.3 ± 0.2     |            | 0.9 ± 0.0           | 0.9 ± 0.0  |                    |            |                      | 0.2 ± 0.1  | 0.4 ± 0.2                | 0.1 ± 0.0  |
| Stearate<br>18:0                  | 87.4 ± 1.8    | 83.5 ± 2.1 | 11.8 ± 0.1          | 11.8 ± 0.1 | 46.2 ± 0.8         | 46.0 ± 1.0 | 43.4 ± 0.9           | 43.4 ± 1.3 | 27.7 ± 0.3               | 27.5 ± 0.6 |
| Oleate<br>18:1 (n - 9)            | 2.9 ± 0.9     | 3.8 ± 0.8  | 22.9 ± 0.2          | 23.1 ± 0.2 | 7.1 ± 0.3          | 6.3 ± 0.3  | 5.9 ± 1.0            | 5.7 ± 0.5  | 8.1 ± 0.2                | 7.6 ± 0.2  |
| Linoleate<br>18:2 (n - 6)         |               |            | 0.5 ± 0.1           | 0.4 ± 0.0  |                    |            |                      | 0.1 ± 0.1  |                          |            |
| Linolenate<br>18:3 (n - 6) and/or |               |            |                     |            |                    |            |                      |            |                          |            |
| Arachidate<br>20:0                | 2.1 ± 0.4     | 2.8 ± 0.2  | 0.1 ± 0.0           |            |                    |            |                      | 0.1 ± 0.1  |                          |            |
| Eicosenoate<br>20:1               |               |            | 1.1 ± 0.1           | 1.1 ± 0.0  | 0.3 ± 0.0          | 0.2 ± 0.0  |                      | 0.1 ± 0.1  | 0.6 ± 0.0                | 0.6 ± 0.0  |
| Eicosadienoate<br>20:2            |               |            | 0.2 ± 0.1           | 0.1 ± 0.0  |                    |            |                      |            |                          |            |
| Eicosatrienoate<br>20:3 (n - 6)   |               |            | 0.2 ± 0.0           | 0.2 ± 0.0  | 0.3 ± 0.0          | 0.3 ± 0.0  | 0.1 ± 0.0            | 0.2 ± 0.1  | 0.3 ± 0.0                | 0.3 ± 0.0  |
| Arachidonate<br>20:4 (n - 6)      |               |            | 3.9 ± 0.1           | 4.0 ± 0.1  | 1.4 ± 0.1          | 1.3 ± 0.1  | 36.7 ± 1.4           | 34.4 ± 1.7 | 11.8 ± 0.1               | 12.1 ± 1.2 |
| Docosatetraenoate<br>22:4 (n - 6) |               |            | 0.7 ± 0.2           | 0.5 ± 0.0  | 3.1 ± 0.0          | 3.0 ± 0.1  |                      |            | 4.9 ± 0.1                | 5.0 ± 0.1  |
| Docosapentaenoate<br>22:5 (n - 6) |               |            |                     |            | 0.3 ± 0.1          | 0.3 ± 0.1  |                      |            | 0.3 ± 0.0                | 0.3 ± 0.0  |
| Docosapentaenoate<br>22:5 (n - 3) |               |            |                     |            | 0.2 ± 0.0          | 0.2 ± 0.0  |                      |            | 0.4 ± 0.0                | 0.6 ± 0.3  |
| Docosahexaenoate<br>22:6 (n - 3)  |               |            | 4.0 ± 0.1           | 4.1 ± 0.1  | 39.4 ± 0.7         | 40.8 ± 0.9 | 4.5 ± 0.3            | 4.9 ± 0.4  | 37.0 ± 0.5               | 37.9 ± 0.6 |

\* Expressed as weight per cent of the listed fatty acids. Values less than 0.1 per cent are not listed.

† Fatty acids are expressed in the form x:y (n - z), where x is the number of carbon atoms in the fatty acid chain, y is the number of double bonds, and z is the number of carbon atoms from the terminal methyl group end of the fatty acid chain at which the first unsaturation occurs. Thus linoleic acid, 18:2 (n - 6), is 18 carbon atoms long and

has two unsaturations occurring between the sixth and seventh and between the ninth and tenth carbon atoms from the terminal methyl group end of the fatty acid chain.

‡ HI mice had an average nitrous oxide requirement of 1.88 ± 0.03 atm (±SE; n = 21).

§ LO mice had an average nitrous oxide requirement of 1.27 ± 0.01 atm (±SE; n = 24).

¶ Mean values ±SE of seven separate synaptic plasma membrane preparations in the HI group and nine separate synaptic plasma membrane preparations in the LO group.

TABLE 2. Phospholipid Compositions and Cholesterol: Phospholipid Molar Ratios of Synaptic Plasma Membranes Isolated from Mice Bred for Their Resistance or Susceptibility to Nitrous Oxide Anesthesia

|                                          | LO            | HI            |
|------------------------------------------|---------------|---------------|
| Sphingomyelin* (SPH)                     | 3.8 ± 0.3†    | 4.4 ± 0.2     |
| Phosphatidylcholine (PC)                 | 41.1 ± 0.8    | 39.5 ± 0.5    |
| Phosphatidylserine (PS)                  | 14.0 ± 0.6    | 15.3 ± 1.1    |
| Phosphatidylinositol (PI)                | 2.8 ± 0.2     | 3.0 ± 0.2     |
| Phosphatidylethanolamine (PE)            | 38.2 ± 1.0    | 37.7 ± 0.8    |
| Molar ratio‡<br>cholesterol/phospholipid | 0.591 ± 0.017 | 0.582 ± 0.019 |

\* Phospholipid content is calculated as the per cent phosphate composition.

† Mean ± SE from seven separate synaptic plasma membrane preparations in the HI group and nine separate synaptic plasma membrane preparations in the LO group.

‡ Calculated from the amount of cholesterol recovered and the amount of phosphate recovered in the SPH, PC, PS, PI, and PE fractions of the TLC plate.

susceptibility to anesthesia rather than a specific selection of mice with different righting response capabilities.

The only notable difference in physical appearances between the HI and LO mice was that about 5 per cent of the HI mice in the fourth and fifth generations showed extensive hair loss. However, these "hairless" mice showed no detectable difference in anesthetic requirements compared with the rest of the HI-group animals. No obvious behavioral difference between the HI and LO mice was seen. No weight difference between the two groups was observed.

The excellent correlation between anesthetic potency and lipid solubility<sup>2,3</sup> and the ability of general anesthetics to fluidize phospholipid<sup>4-8</sup> and alter the physical state of biological membranes<sup>4,20</sup> suggested to us that our approach might have selected mice with altered neuronal membrane lipid compositions. For instance, the HI mice might resist the fluidizing effects of anesthetics by having a higher content of saturated fatty acids or cholesterol or a larger amount of phospholipids with higher phase transition temperatures. However, fatty-acid, phospholipid, or cholesterol compositions did not differ between the two groups of mice separated by 0.61 atm in nitrous oxide requirements. Although we found no significant difference in synaptic membrane fatty-acid, phospholipid, or cholesterol compositions in the HI and LO animals, synaptic membrane lipids may still play a role in explaining the alterations in nitrous oxide requirements. Gangliosides constitute about 10 per cent of the synaptic plasma membrane lipids<sup>21</sup> and were not analyzed in this study. In addition, synaptic membrane lipids contain a significant proportion of alkenyl

acyl *sn*-glycero-3 phosphoryl ethanolamine,<sup>22,23</sup> but for the present investigation the alkenyl acyl compounds were not examined separately from the diacyl compounds, and the alkenyl derivatives were not quantitated. Furthermore, if the alterations in anesthetic requirement were the result of a specific change in fatty-acid, phospholipid, or cholesterol composition of synaptic membranes in one small brain region, or the result of an alteration in only a small region of the synaptic membranes (such as the region neighboring membrane proteins), the present techniques would not be sensitive enough to detect such a change. We are presently searching for other explanations, since demonstration of the structural change that produces the difference in anesthetic requirements may indicate the answer to a broader question: how do anesthetics act?

The present experiments may also have clinical implications. The extremes achieved by breeding imply that variations in patient responses may represent basic differences in resistance to anesthesia. The difference in the occasional patient who is unusually susceptible or resistant to anesthesia may not be the result of a pharmacologic or physiologic effect such as drug abuse or change in body temperature alone. Instead, tolerance or intolerance to anesthesia may result from genetically defined differences in the central nervous system.

## References

1. Eger EI II, Saidman LJ, Brandstater B: Minimum alveolar anesthetic concentration: A standard of anesthetic potency. *ANESTHESIOLOGY* 26:756-763, 1965
2. Eger EI II, Lundgren C, Miller SL, et al: Anesthetic potencies of sulfur hexafluoride, carbon tetrafluoride, chloroform and Éthane in dogs. *ANESTHESIOLOGY* 30:129-135, 1969
3. Miller KW, Paton WDM, Smith EB, et al: Physicochemical approaches to the mode of action of general anesthetics. *ANESTHESIOLOGY* 36:339-351, 1972
4. Vanderkooi M, Landesberg R, Selick H, et al: Interaction of general anesthetics with phospholipid vesicles and biological membranes. *Biochim Biophys Acta* 464:1-16, 1977
5. Miller KW, Pang KY: General anesthetics can selectively perturb lipid bilayer membranes. *Nature* 263:253-255, 1976
6. Trudell JR: A unitary theory of anesthesia based on lateral phase separations in nerve membranes. *ANESTHESIOLOGY* 46: 5-10, 1977
7. Mastrangelo CJ, Trudell JR, Edmunds HN, et al: Effect of clinical concentrations of halothane on phospholipid cholesterol membrane fluidity. *Mol Pharmacol* 14:463-467, 1978
8. MacDonald AG: A dilatometric investigation of the effects of general anesthetics, alcohols, and hydrostatic pressure on the phase transition in smectic mesophases of dipalmitoyl-phosphatidylcholine. *Biochim Biophys Acta* 507:26-37, 1978
9. Halsey MJ, Eger EI II, Kent DW, et al: High-pressure studies

- of anesthesia. *Progress in Anesthesiology*. Volume 1. Edited by BR Fink. New York, Raven Press, 1975, pp 353-361
10. Jones DH, Matus AI: Isolation of synaptic plasma membrane from brain by combined flotation-sedimentation density gradient centrifugation. *Biochim Biophys Acta* 356:276-187, 1974
  11. Morrison WR, Smith LM: Preparation of fatty acid methyl esters and dimethyl-acetals from lipids with boron fluoride-methanol. *J Lipid Res* 5:600-608, 1964
  12. Rouser G, Siakotos AN, Fleischer S: Quantitative analysis of phospholipids by thin-layer chromatography and phosphorus analysis of spots. *Lipids* 1:85-86, 1966
  13. Koblin DD, Dong DE, Eger EI II: Tolerance of mice to nitrous oxide. *J Pharmacol Exp Ther* 211:317-325, 1979
  14. Broadhurst PL: *Drugs and the Inheritance of Behavior*. New York, Plenum Press, 1978
  15. Rusi M, Eriksson K, Maki J: Genetic differences in the susceptibility to acute ethanol intoxication in selected rat strains. *Adv Exp Med Biol* 85A:98-109, 1977
  16. McClearn GE, Kakihana R: Selective breeding for ethanol sensitivity in mice. *Behav Genet* 3:409-410, 1973
  17. Judson BA, Goldstein A: Genetic control of opiate-induced locomotor activity in mice. *J Pharmacol Exp Ther* 206:56-60, 1978
  18. Elias MF, Eleftheriou BE: A behavior-genetic investigation of induction and eduction times for halothane anesthesia. *Behav Res Meth Inst* 7:7-10, 1975
  19. Eger EI II: *Anesthetic Uptake and Action*. Baltimore, Williams and Wilkins, 1974
  20. Rosenberg PH, Jannson S, Gripenberg J: Effects of halothane, thiopental and lidocaine on fluidity of synaptic plasma membranes and artificial phospholipid membranes. *ANESTHESIOLOGY* 46:322-326, 1977
  21. Breckenridge WC, Gombos G, Morgan IG: The lipid composition of adult rat brain synaptosomal plasma membranes. *Biochim Biophys Acta* 266:695-707, 1972
  22. Cotman C, Blank ML, Moehl A, et al: Lipid composition of synaptic plasma membranes isolated from rat brain by zonal centrifugation. *Biochemistry* 8:4606-4612, 1969
  23. Sun GA, Sun AY: Synaptosomal plasma membranes: Acyl group composition of phosphoglycerides and (Na<sup>+</sup> + K<sup>+</sup>)-ATPase activity during fatty acid deficiency. *J Neurochem* 22:15-18, 1974
